# Supplementary material for: WO3based solid solution oxide – promising proton exchange membrane fuel cell anode electro-catalyst
Source: Royal Society of Chemistry journal article supplement (doi:10.1039/c5ta03792a), 2015-01-01
Supplement: c5ta03792a1.pdf [file c5ta03792a1.pdf]

**Supporting information**

**WO<sub>3</sub> based solid solution oxide – promising proton exchange membrane fuel cell anode**

**electro-catalyst**

Prasad Prakash Patel<sup>1</sup>, Prashanth H. Jampani<sup>2</sup>, Moni Kanchan Datta<sup>2,3</sup>, Oleg I. Velikokhatnyi<sup>2,3</sup>,  
Daeho Hong<sup>2</sup>, James A. Poston<sup>4</sup>, Ayyakkannu Manivannan<sup>4</sup>, Prashant N. Kumta<sup>1,2,3,5,6\*</sup>

<sup>1</sup>Department of Chemical and Petroleum Engineering, Swanson School of Engineering, University of Pittsburgh, Pittsburgh, PA 15261, USA.

<sup>2</sup>Department of Bioengineering, Swanson School of Engineering, University of Pittsburgh, Pittsburgh, PA 15261, USA.

<sup>3</sup>Center for Complex Engineered Multifunctional Materials, University of Pittsburgh, PA 15261, USA.

<sup>4</sup>US Department of Energy, National Energy Technology Laboratory, Morgantown, WV 26507.

<sup>5</sup>Mechanical Engineering and Materials Science, Swanson School of Engineering, University of Pittsburgh, Pittsburgh, PA 15261, USA.

<sup>6</sup>School of Dental Medicine, University of Pittsburgh, PA 15217, USA.

\*Corresponding author: Prashant N. Kumta (pkumta@pitt.edu)

Department of Bioengineering, 815C Benedum Hall, 3700 O'Hara Street, Pittsburgh, PA 15261.

Tel: +1-412-648-0223, Fax: +1-412-624-3699

**This abstract was presented at the 2014 AIChE annual meeting in Atlanta, GA (November 16-21, 2014).**

**Section S1:** The possible reaction scheme for the formation of  $\text{WO}_3$  from sodium tungstate dehydrate ( $\text{Na}_2\text{WO}_4 \cdot 2\text{H}_2\text{O}$ ) is given as <sup>1</sup>:

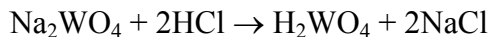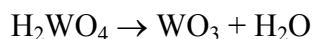

In the synthesis of  $\text{WO}_3$  from  $\text{Na}_2\text{WO}_4 \cdot 2\text{H}_2\text{O}$ , hydrated tungsten trioxide ( $\text{H}_2\text{WO}_4$ ) is obtained as a precipitate and forms pure  $\text{WO}_3$  upon further heat treatment. To determine the temperature of heat-treatment of  $\text{H}_2\text{WO}_4$  and thus, to obtain pure  $\text{WO}_3$ , thermogravimetric analysis (TGA) was conducted in ultra-high purity Argon (UHP-Ar) atmosphere (Flow rate=40 ml/min) as shown in **Fig. S1**. TGA results show that there is a steady loss in weight upto  $\sim 320^\circ\text{C}$  indicative of a transformation of  $\text{H}_2\text{WO}_4$  to  $\text{WO}_3$  (expected weight loss  $\sim 7.2\%$ ). Hence, heat-treatment of  $\text{H}_2\text{WO}_4$  was carried out at  $350^\circ\text{C}$  for 2 h to obtain pure  $\text{WO}_3$ .

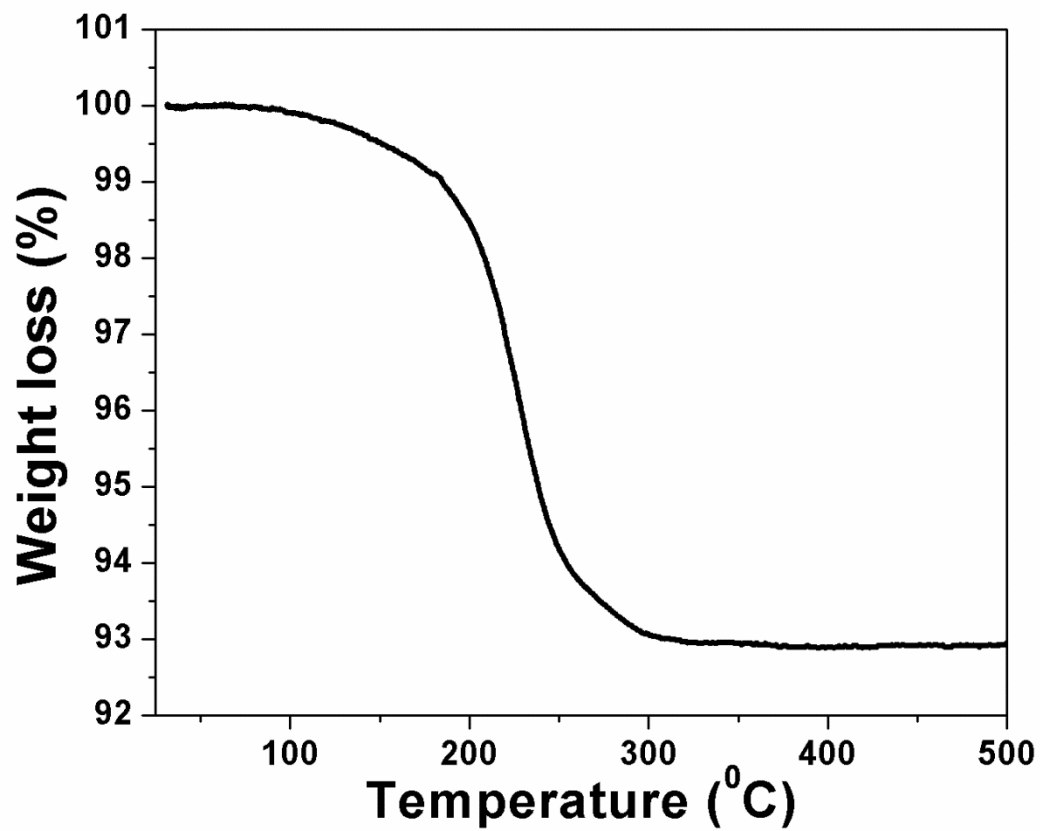

**Figure S1:** TGA plot of H<sub>2</sub>WO<sub>4</sub> powder in UHP-Argon atmosphere showing the weight loss.

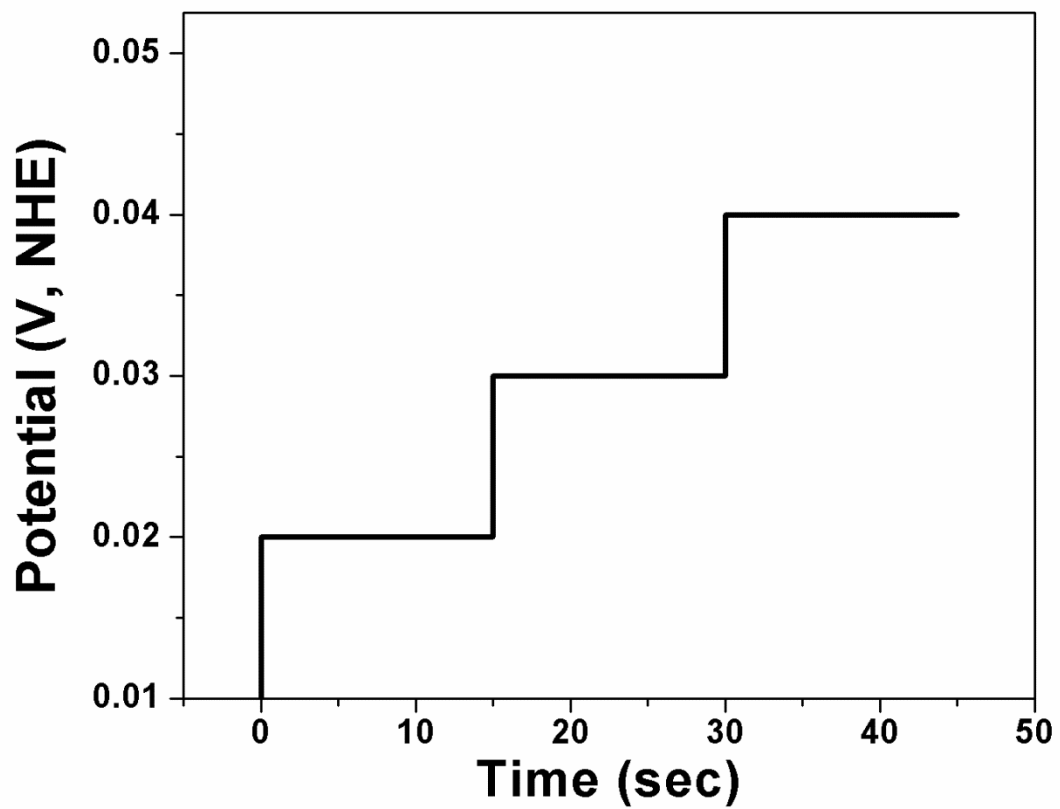

**Figure S2:** Method of multiple small potential steps used on the RDE to reduce the contribution by charging current and current measurement was performed at the end of each step<sup>2</sup>.

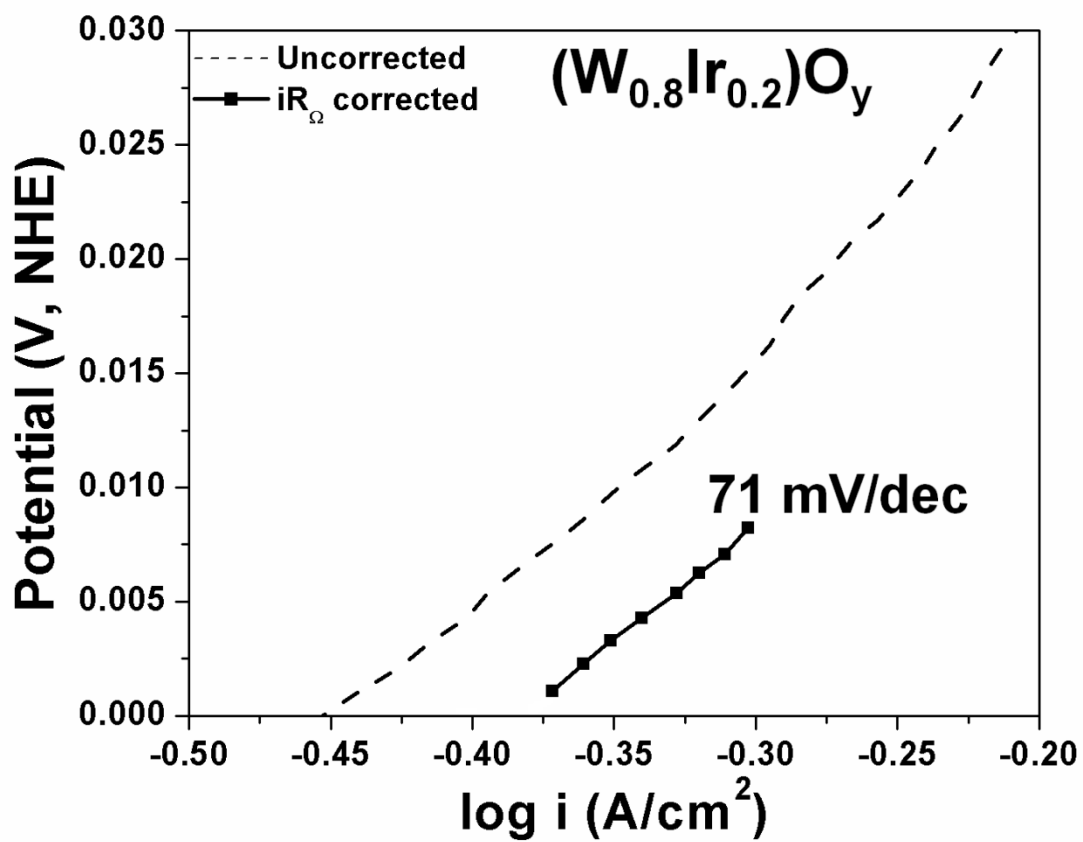

**Figure S3:** Tafel plot of  $(W_{0.8}Ir_{0.2})O_y$ , before and after  $iR_\Omega$  correction.

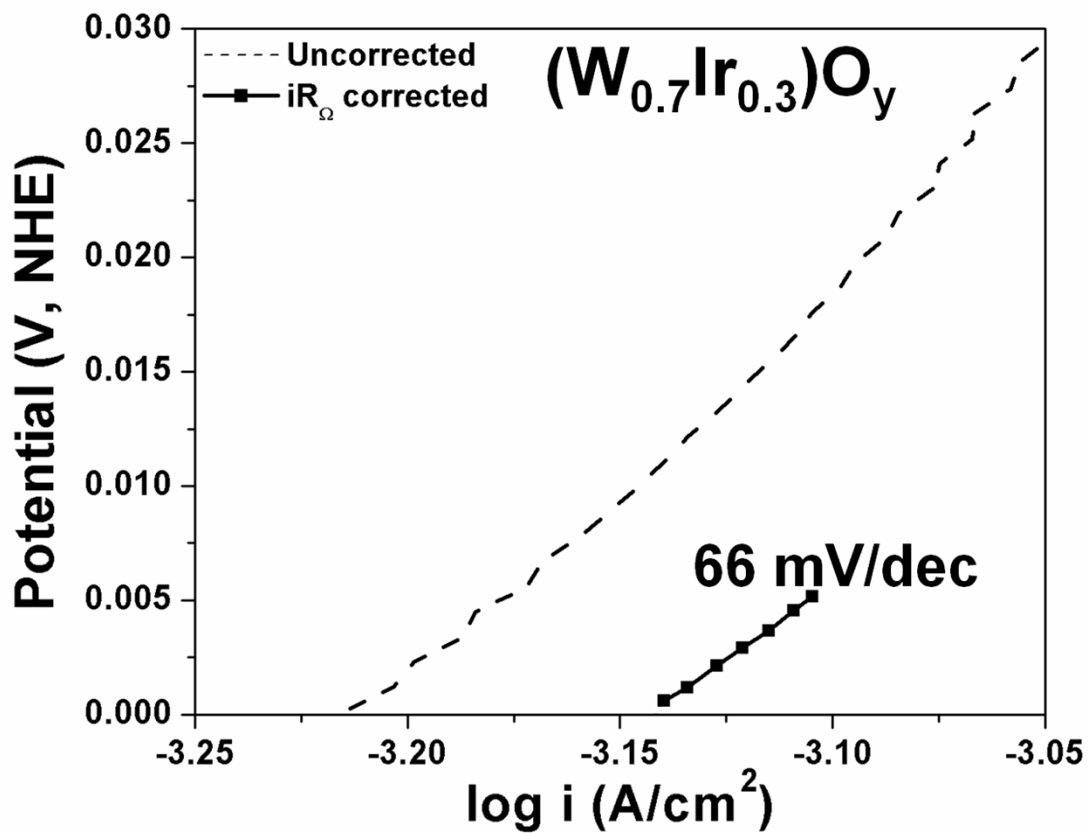

Figure S4: Tafel plot of  $(W_{0.7}Ir_{0.3})O_y$ , before and after  $iR_{\Omega}$  correction.

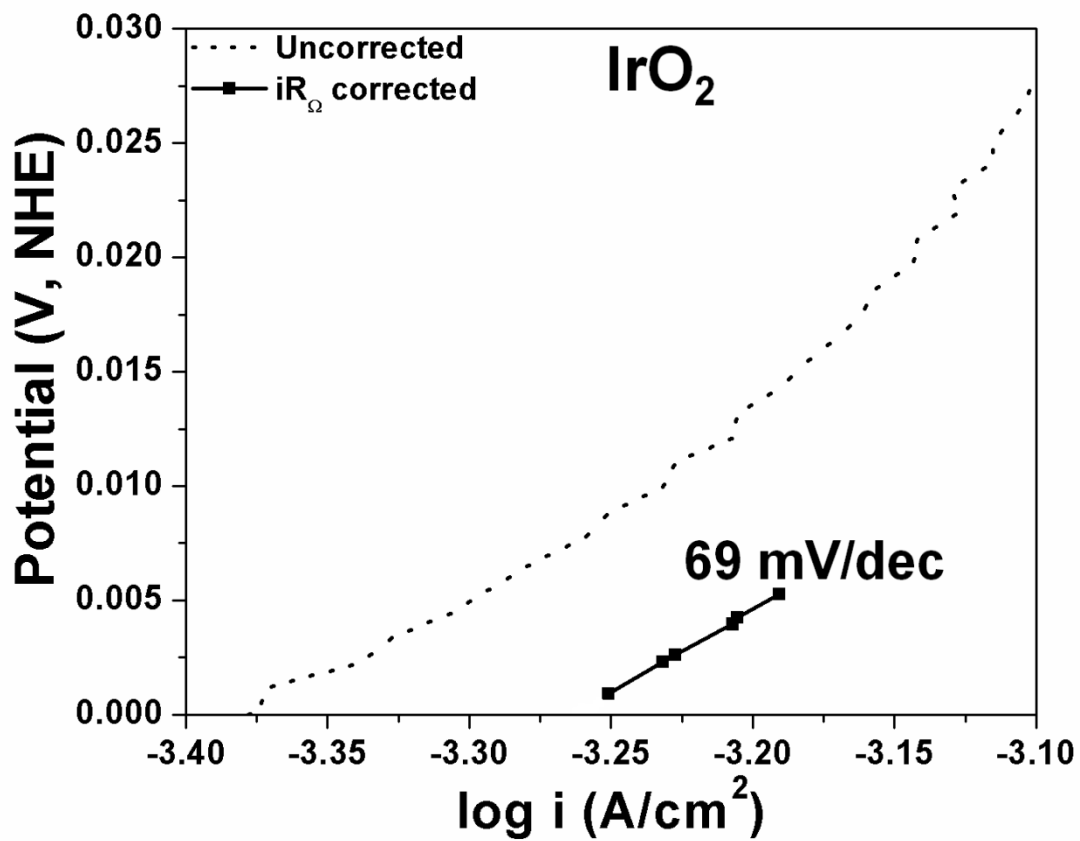

Figure S5: Tafel plot of IrO<sub>2</sub>, before and after iR<sub>Ω</sub> correction.

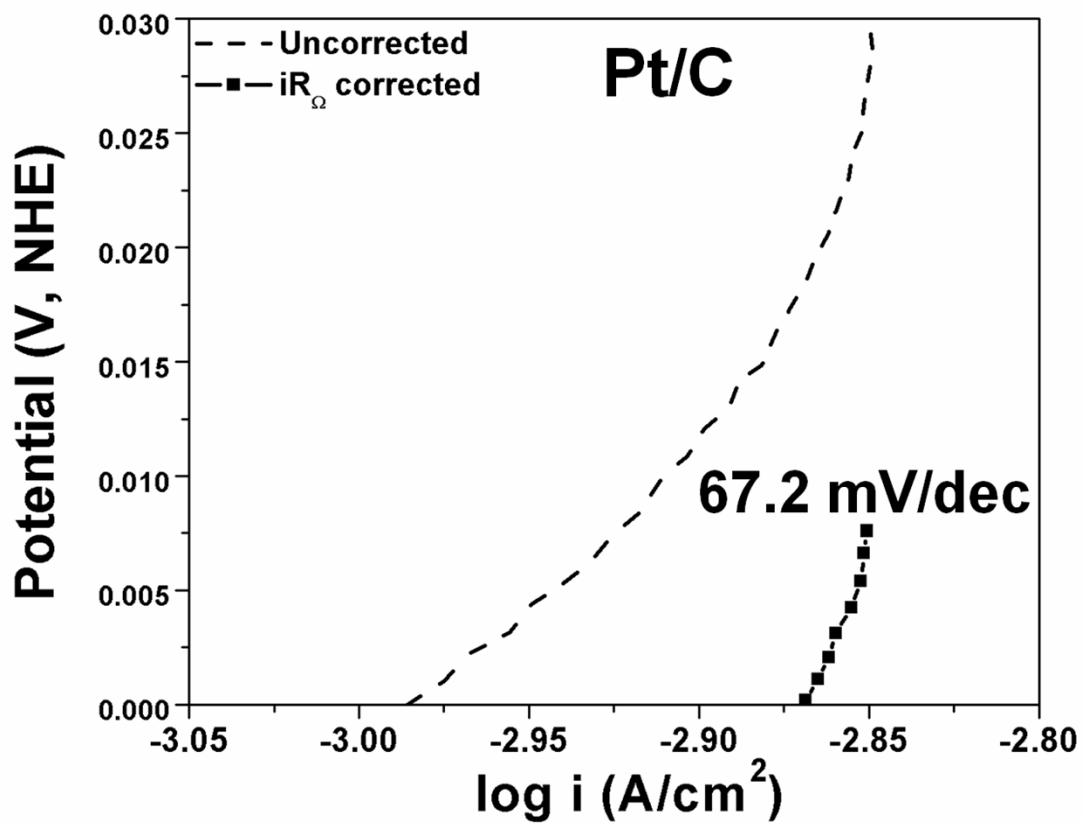

**Figure S6:** Tafel plot of Pt/C, before and after  $iR_{\Omega}$  correction.



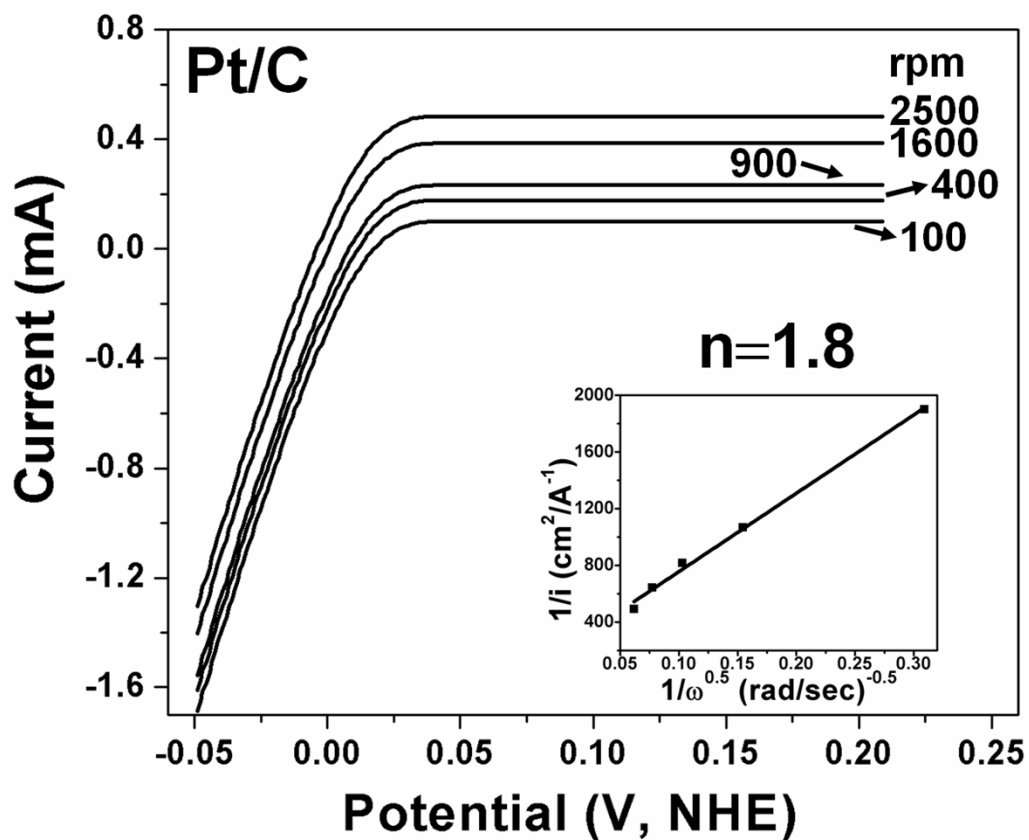

**Figure S7:** The linear scan voltammogram (LSV) curves for HOR of Pt/C obtained on rotating disk electrode (RDE) at different rotating speeds, measured in H<sub>2</sub> saturated 0.5 M H<sub>2</sub>SO<sub>4</sub> solution at 40°C with a scan rate of 10 mV/sec. Koutechy-Levich plot of Pt/C is shown in the inset of

LSV curve.

**References:**

1. M. Nagarajan, G. Paruthimal kалаignan and G. A. Pathanjali, *International Journal of Hydrogen Energy*, 2011, 36, 14829-14837.
2. P. P. Patel, M. K. Datta, O. I. Velikokhatnyi, P. Jampani, D. Hong, J. A. Poston, A. Manivannan and P. N. Kumta, *Journal of Materials Chemistry A*, 2015, 3, 14015-14032.
